# Supplementary material
Source: PubMed Central journal article supplement (PMC3631087)
Supplement: 12192_2012_384_MOESM1_ESM.pdf [file 12192_2012_384_MOESM1_ESM.pdf]

FGENESH 2.6 Prediction of potential genes in Monocot genomic DNA

Seq name: test sequence

Length of sequence: 5187

Number of predicted genes 1: in +chain 1, in -chain 0.

Number of predicted exons 10: in +chain 10, in -chain 0.

Positions of predicted genes and exons: Variant 1 from 1, Score: 55.285675

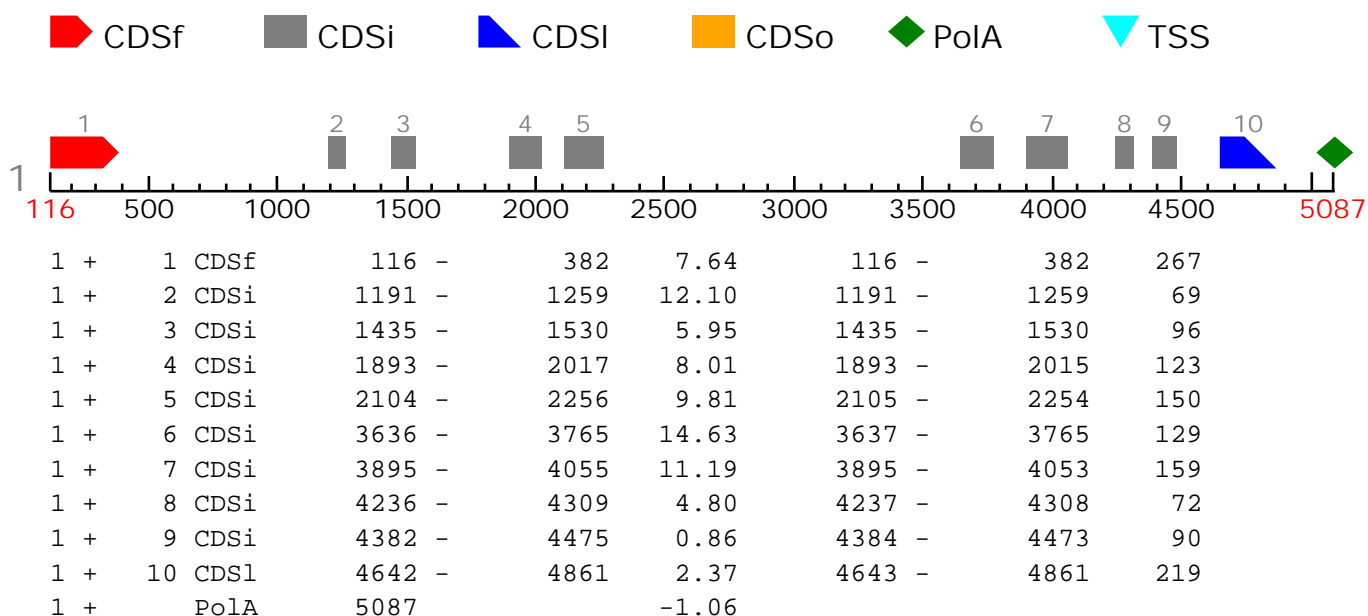

Predicted protein(s):

>FGENESH:[mRNA] 1 10 exon (s) 116 - 4861 1389 bp, chain +  
 ATGGCCGCGCGCTCATCGTCCCCGCAAACCCAAACCTACTCCAAACCCACCTCCTCC  
 CTCCGTCCCCCATCGCGTGCCGCTCCAGTGTGCTCCGCTTCCCCCGCCGCGACCGCGCT  
 CGAACCCATCTCACTGCCGCGTTTGGGAGGGGATCACCCGCGGCGGCGGCCGAGCGCGGC  
 GGAAGGACTACTACGCTACGCTGAACCTCCGCGCGACGCCACCCTGCAGGAGGTCAAG  
 ACGGCCTACCGTACCCTAGCGCGCAAGTACCATCCTGATATGAACAAGGACCCTGGGGCA  
 GAAGAAAAGTTTAAGGAGATAAGTGCCGCATACGAGATTCTATCAGATGAAGAAAAAGA  
 TCTCTGTATGACCGCTTTGGAGAAGCAGGGCTCACTGGAGATTATGGAGGTGGAGATATT  
 GGCTCCAATGGGATTGATCCATATGAACTCTTCAATGCATTCTTTGGTGGCCCTGATAAG  
 CTTTTTAGAGACAGCATGGGTGCTGGGAGATTCCATTATGGTACAAAAGTACAGACAAC  
 AGGGGACTTGATATTCGATATGATCTTCTCCTTTCTTTTGAAGAATCAATAATTGGAGGC  
 AAACGAGAAGTCAGCATTFTTTCGTTATGAAACCTGTGGCACTTGCCATGGAACCTGGTGCT  
 AAATCTAGCAATGACATAACAGAATGTACTCAATGCAGAGGTCAAGGCAGGCGCGCAACT  
 GGTGACCTATACATATTTGTTTCATGTTAATAAAAAAGAAGGCATCCACAGAGAAGGCCTC  
 GATCTGTTCTCAGATGTCACAATAGATTATACTGATGCAATTTTAGGAACCACAGTGAAG  
 GTTGAAACAATAGAGGGATTCAAGGATCTTTATATTCCTCCTGGCACTCAGCCTGGGGAG  
 CGGCTGAAATTTGCTCAACTGGGAGCTCCAGACATTAAGAATCCTACCATTAGAGGAGAT  
 CATAATTTTGTGATAAATGTGAAGATCCCGAAGAGTATCAGCAACCAAGAACGAACATTA  
 GTACAAGAAATTGCAGCACTGAAGGAACTGGGTGTATTTCTGTTCCAGGTGAAGAGACT  
 AAAACAGAGAAAATTTGGGAGAGAGAACTCCCATTTCATCCACAGGGAAGAGAAGATCC  
 CTCTGGCGATCTATCAGGAATTTGTTTCAGGGGCGACGATGGGGATACGAGATTTGCTTCA  
 ATCAGCGCACAACTCTGTTACTCCATTATGGACTCCGCGACGAGGATCTCATCCAGCTGTT  
 CTGTTGCTAGAAGGATTCTGATGATCACAGTGCTCTTATTCGTGATAAGCAGAACTCGT

ATAATCAGGTCGACTCCAAAGCGGTATGATCGTCCTACTGAAGCTAAAGAAGCCGATGGA  
GAGACTTAA

>FGENESH: 1 10 exon (s) 116 - 4861 462 aa, chain +

MAAALIVPANPNPTPNPTSSLRPPSRAASSVLRFPRRDRARTHLTAAFGRGSPAAAAERG  
GKDYYATLNLRRDATLQEVKTAYRTLARKYHPDMNKDPGAEEKFKEISAAYEILSDEEKR  
SLYDRFGEAGLTGDYGGGDIGSNGIDPYELFNAFFGGPKLFRDSMGAGRFHYGTKVTDN  
RGLDIRYDLLLLSFEESIIGGKREVSIFRYETCGTCHGTGAKSSNDITECTQCRGQGRAT  
GDLYIFVHVNKKEGIHREGLDLFSDVTIDYTDAILGTTVKVETIEGFKDLYIPPGTQPGE  
RLKFAQLGAPDIKNPTIRGDHNFVINVKIPKISNQERTLVQEIAALKETGCISVPGEET  
KNRENLGERNSHSSTGKRRSLWRSIRNLFRGDDGDTRFASISAQSVTPLWTPRRGSHPAV  
LLEGLFLMITVLLFVISRTRIIRSTPKRYDRPTEAKEADGET
